# Supplementary material for: Promising Tools in Prostate Cancer Research: Selective Non-Steroidal Cytochrome P450 17A1 Inhibitors
Source: PubMed Central journal article supplement (PMC4942611; doi:10.1038/srep29468), 2016-07-12
Supplement: srep29468-s1.pdf [file srep29468-s1.pdf]

## Supplementary Information

# Promising Tools in Prostate Cancer Research –Selective Non-Steroidal Cytochrome P450 17A1 Inhibitors

*Silvia Bonomo<sup>1</sup>, Cecilie H. Hansen<sup>2</sup>, Elyse M. Petrunak<sup>3</sup>, Emily E. Scott<sup>3</sup>, Bjarne Styrishave<sup>2</sup>,  
Flemming Steen Jørgensen<sup>1</sup> and Lars Olsen<sup>1,\*</sup>*

<sup>1</sup>Department of Drug Design and Pharmacology, University of Copenhagen, Universitetsparken 2, DK-2100, Copenhagen Ø, Denmark.

<sup>2</sup>Department of Pharmacy, University of Copenhagen, Universitetsparken 2, DK-2100 Copenhagen Ø, Denmark.

<sup>3</sup>Department of Medicinal Chemistry, The University of Kansas, 1251 Wescoe Hall Dr., Lawrence, KS, 66045 USA.

# Contents

**Figure S1:** Training set of compounds used to select the best ChemScore cutoff for screening the docking results.

**Figure S2:** 2D representation of the simplified heme model and the heterocycles used for the DFT calculations.

**Figure S3:** Virtual hits from ZINC and eMolecules databases.

**Figure S4:** Absorbance difference vs. ligand concentration plots for compounds **1-5**.

**Figure S5:** Structures of compound **2** and its commercially available analogues tested for their binding properties to CYP17A1.

**Table S1:** Biological characterization of compound **3-7** with the purified, human CYP17A1.

**Table S2:** Complete biological characterization of compound **1, 2** and abiraterone on the production of steroidal hormones in the H295R cell line.

**Table S3:** Ionization fragments, retention times and molar masses for on-line clean-up and analysis of steroids from the H295R assay.

**Appendix 1.** Purity data for compound **1** provided by MayBridge LTD vendor

**Appendix 2.** Purity data for compound **2** provided by the ChemBridge vendor.

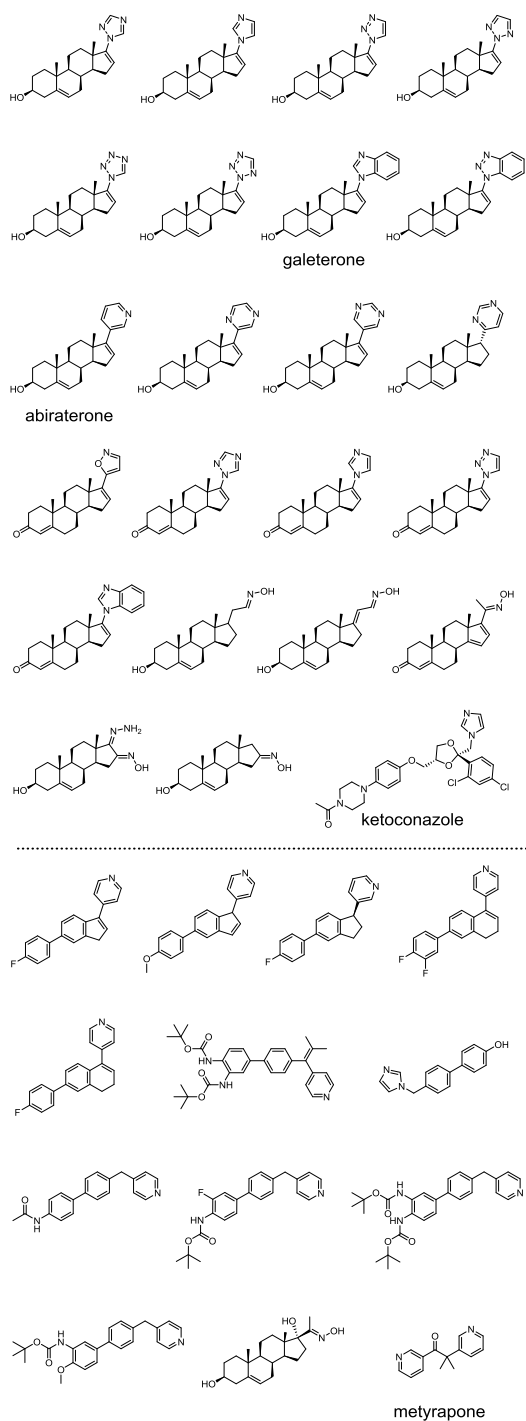

**Figure S1.** Training set of compounds used to select the best ChemScore cutoff for screening the docking results. The top panel contains inhibitor compounds ( $IC_{50} < 5000$  nM), whereas the non-inhibitors ( $IC_{50} > 5000$  nM) are shown in the lower panel<sup>1,2,3</sup>.

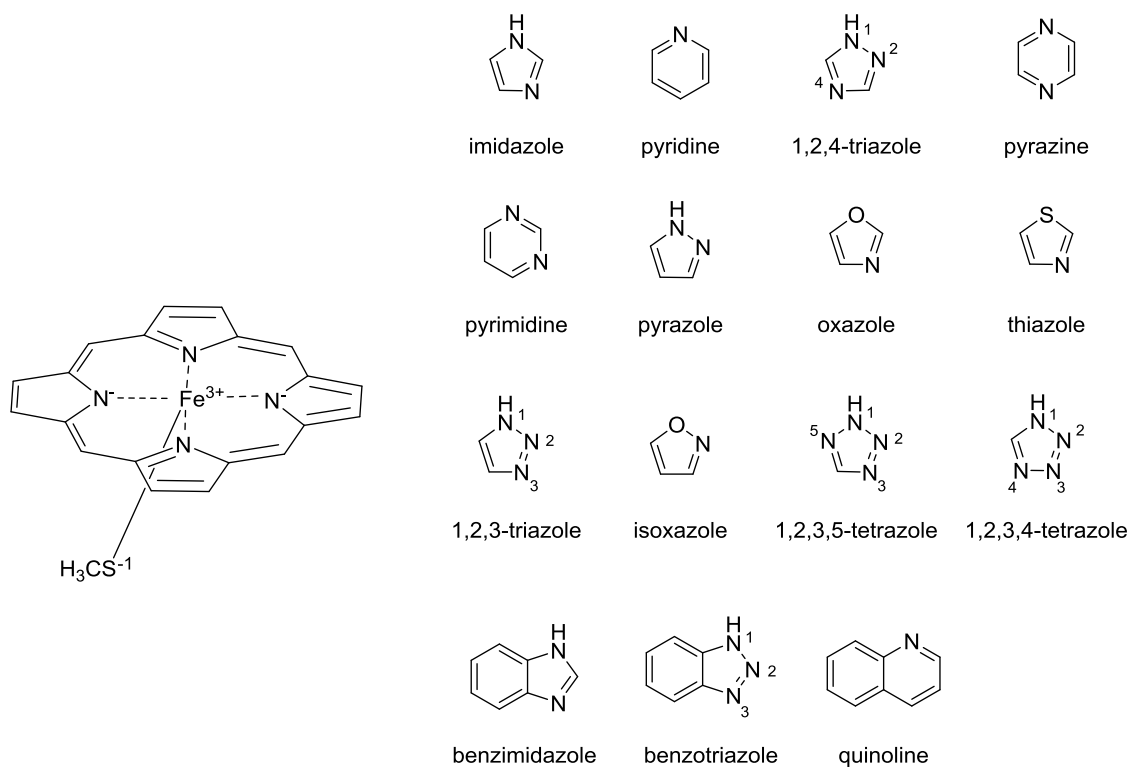

**Figure S2.** 2D representation of the simplified heme model (a) and the heterocycles (b) used for the DFT calculations. The order in which the structures are reported resembles the rank obtained by the DFT calculations and shown in Figure 2 of the main paper.

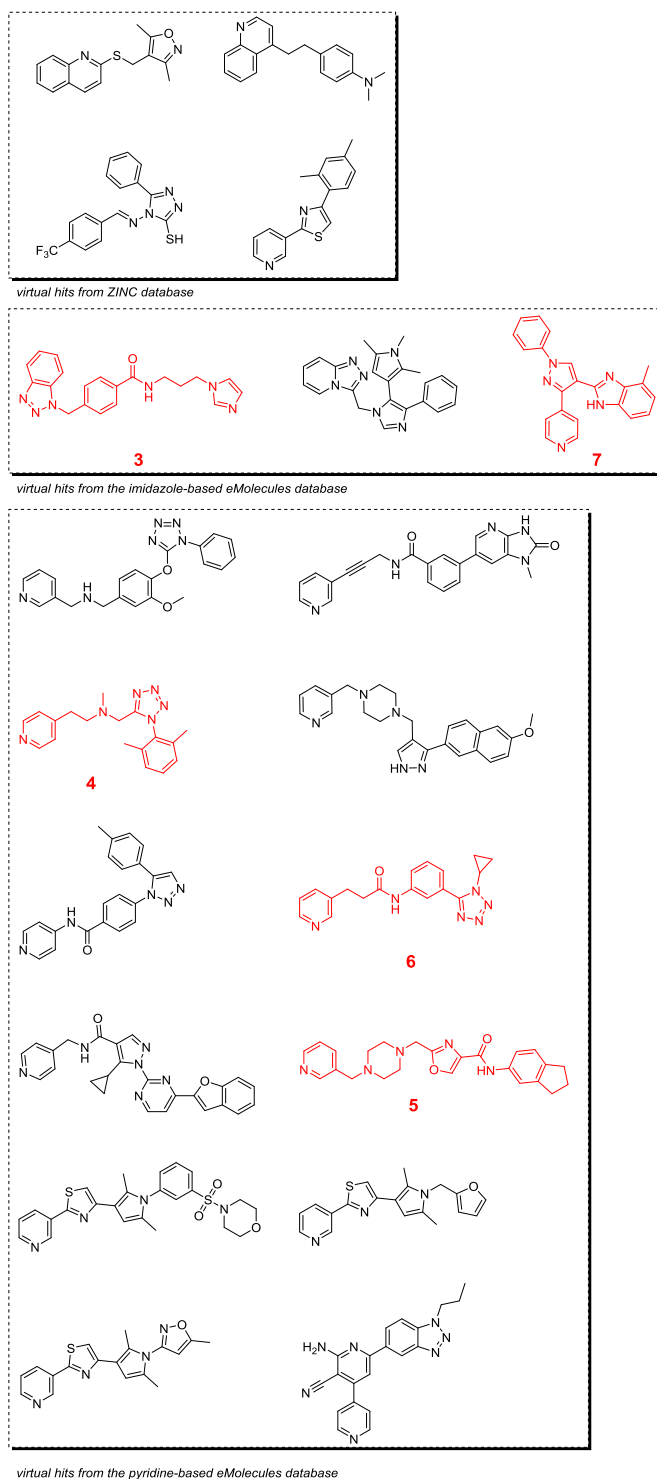

**Figure S3.** Virtual hits from ZINC and eMolecules databases. These compounds were tested for their ability to coordinate the heme iron by recording their UV-VIS spectrum in presence of CYP17A1. Compounds colored in red gave a type II shift of the UV-VIS spectrum, but were not able to inhibit the enzyme activity.

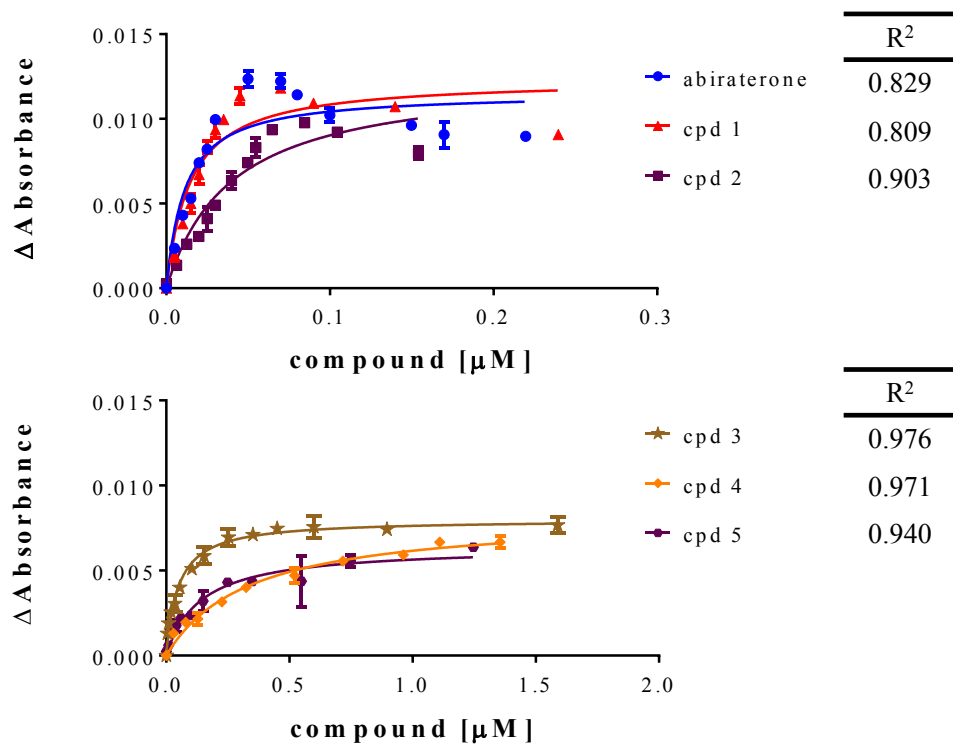

**Figure S4.** Absorbance difference against ligand concentration plots for compounds 1-5 and abiraterone.  $R^2$  values for each data fitting to the binding equation are reported.

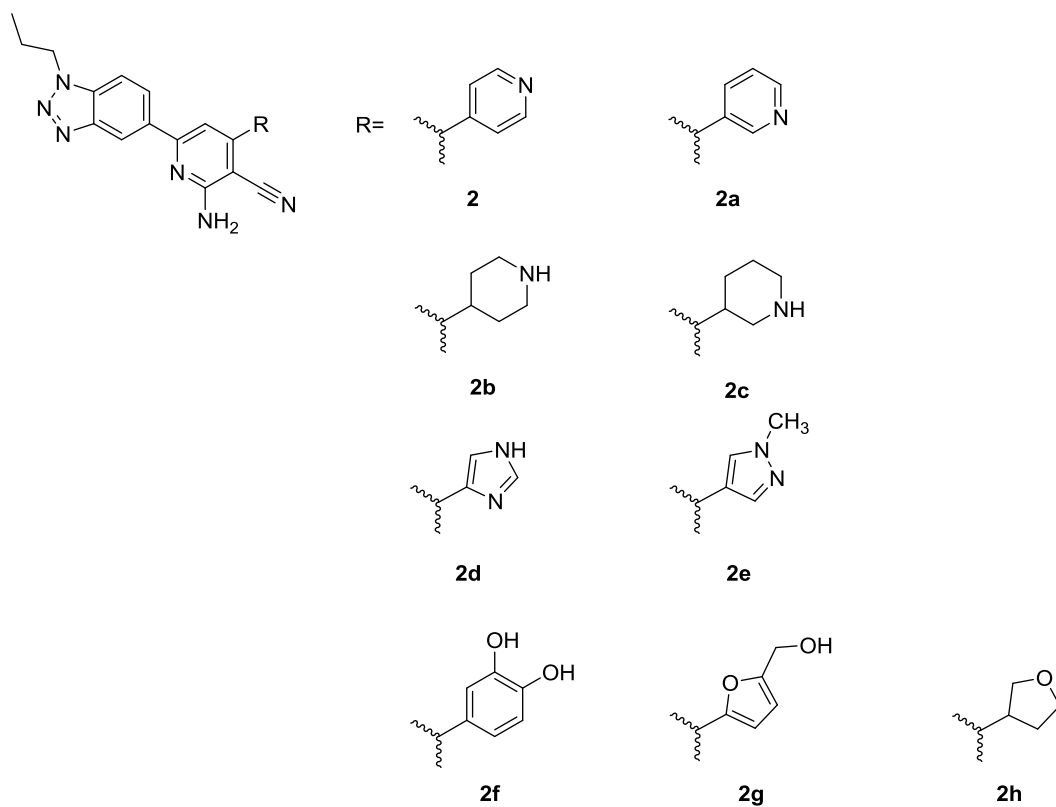

**Figure S5.** Structures of compound **2** and its commercially available analogues tested for their binding properties to CYP17A1.

**Table S1.** Biological characterization of compound **3-7** with the purified, human CYP17A1.

| Compound | $K_d$ [nM] <sup>a</sup> | $IC_{50}$ [nM] <sup>b</sup> |                 |
|----------|-------------------------|-----------------------------|-----------------|
|          |                         | hydroxylase                 | lyase           |
| <b>3</b> | 400±40                  | >10000                      | ND <sup>e</sup> |
| <b>4</b> | <<100                   | >10000                      | ND <sup>e</sup> |
| <b>5</b> | 150±20 <sup>d</sup>     | >10000                      | ND <sup>e</sup> |
| <b>6</b> | ND <sup>e</sup>         | >10000                      | ND <sup>e</sup> |
| <b>7</b> | ND <sup>e</sup>         | >10000                      | ND <sup>e</sup> |

<sup>a</sup>Mean value over 2 measurements±standard error. <sup>b</sup>Mean value over 3 measurements±standard error. Assays based on the conversion of progesterone in 17 $\alpha$ -hydroxyprogesterone and 17 $\alpha$ -hydroxypregnenolone into DHEA for hydroxylase and lyase, respectively. <sup>c</sup>The measurement suffers of intrinsic inaccuracy because of the  $K_d$  value smaller than the lowest protein concentration at which the titration can be performed with acceptable signal:noise (100 nM). <sup>d</sup>Calculated using the highest absorbance data. <sup>e</sup>ND: not determined.



**Table S2.** Complete biological characterization of the effects of compound **1**, **2** and abiraterone on the production of steroidal hormones in the H295R cell line.

|                        | compound 1                            |                 | compound 2                            |                 | abiraterone                           |         |
|------------------------|---------------------------------------|-----------------|---------------------------------------|-----------------|---------------------------------------|---------|
|                        | IC <sub>50</sub><br>[nM] <sup>a</sup> | P-value         | IC <sub>50</sub><br>[nM] <sup>a</sup> | P-value         | IC <sub>50</sub><br>[nM] <sup>a</sup> | P-value |
| <b>Progestagens</b>    |                                       |                 |                                       |                 |                                       |         |
| PREG                   | 390±70                                | 0.1024          | 15±3                                  | 0.156           | 5.9±0.5                               | 0.010   |
|                        | 500±70 <sup>b</sup>                   | 0.0749          | 19±4 <sup>b</sup>                     | 0.0632          | 7.3±0.3 <sup>b</sup>                  | 0.0028  |
| PROG                   | ND <sup>c</sup>                       | ND <sup>c</sup> | ND <sup>c</sup>                       | ND <sup>c</sup> | 181±5                                 | <0.0001 |
|                        | 146±7 <sup>b</sup>                    | 0.0086          | 32±4 <sup>b</sup>                     | 0.0518          | 1.0±0.1 <sup>b</sup>                  | 0.0014  |
| 17OH-PREG              | 830±80                                | 0.0153          | 52±4                                  | 0.0038          | 9.7±0.3                               | <0.0001 |
| 17OH-PROG              | 800±200                               | 0.1705          | 20±1                                  | 0.0008          | 6.3±0.2                               | <0.0001 |
| <b>Corticosteroids</b> |                                       |                 |                                       |                 |                                       |         |
| 11deoxy-COS            | 310±60                                | 0.1633          | 23.8±0.9                              | 0.0002          | 2.6±0.5 <sup>d</sup>                  | 0.0304  |
|                        | 146±4 <sup>b</sup>                    | 0.0144          |                                       |                 | 240±20 <sup>e</sup>                   |         |
| COS                    | ND <sup>c</sup>                       | ND <sup>c</sup> | 36±4                                  | 0.021           | 2.9±0.5 <sup>d</sup>                  | 0.0179  |
|                        | 56±1 <sup>b</sup>                     | 0.0285          |                                       |                 |                                       |         |
| 11deoxy-COR            | 480±10                                | <0.0001         | 54±5                                  | 0.017           | 5.3±0.1                               | <0.0001 |
| COR                    | 1200±100                              | 0.0135          | 36±4                                  | 0.028           | 5.0±0.4                               | 0.0092  |
| CORNE                  | 700±100                               | 0.0777          | 23±1                                  | 0.0005          | 2.5±0.1                               | <0.0001 |
| <b>Androgens</b>       |                                       |                 |                                       |                 |                                       |         |
| DHEA                   | 94±30                                 | 0.0001          | 7.4±0.1                               | <0.0001         | 1.8±0.1                               | <0.0001 |
| AN                     | 68±2                                  | <0.0001         | 4.3±0.1                               | <0.0001         | 0.5±0.0                               | <0.0001 |
| TS                     | 52±2                                  | <0.0001         | 3.3±0.2                               | 0.0006          | 0.2±0.0                               | 0.0024  |
| <b>Estrogens</b>       |                                       |                 |                                       |                 |                                       |         |
| E1                     | 220±10                                | 0.0004          | 19±3                                  | 0.0597          | 0.8±0.1                               | 0.0053  |
| β-E2                   | 235±6                                 | 0.0001          | 50±10                                 | 0.146           | 408±60                                | 0.0953  |

<sup>a</sup>Mean value over 6 to 15 measurements±standard error. <sup>b</sup>EC<sub>200</sub>±standard error and relative P-value. <sup>c</sup>ND: not determined. <sup>d</sup>Value calculate on low concentrations of abiraterone (first part of the Guassian-like curve). <sup>e</sup>Value calculated using high concentrations of abiraterone (second part of the Guassian-like curve).

**Table S3.** Ionization fragments, retention times and molar masses for on-line clean-up and analysis of steroids from the H295R assay.

| Steroid <sup>a</sup> | IS <sup>b</sup> | C <sub>x</sub> H <sub>y</sub> O <sub>z</sub> <sup>c</sup> | M <sup>d</sup> | Precursor Ion      | Quantifier Ion | Qualifier Ion | RT <sup>e</sup> |
|----------------------|-----------------|-----------------------------------------------------------|----------------|--------------------|----------------|---------------|-----------------|
| AN                   | AN-d7           | C <sub>19</sub> H <sub>26</sub> O <sub>2</sub>            | 286.4          | 287.1              | 96.9           | 108.9         | 9.29            |
| ADIOL                | DHT-d3          | C <sub>19</sub> H <sub>30</sub> O <sub>2</sub>            | 290.4          | 255.2 <sup>e</sup> | 159.0          | 145.0         | 11.19           |
| DHEA                 | DHEA-d6         | C <sub>19</sub> H <sub>28</sub> O <sub>2</sub>            | 288.4          | 271.2 <sup>f</sup> | 213.1          | 159.0         | 10.29           |
| TS                   | TS-d3           | C <sub>19</sub> H <sub>28</sub> O <sub>2</sub>            | 288.4          | 289.1              | 96.9           | 108.9         | 9.84            |
| ALDO                 | COR-d4          | C <sub>21</sub> H <sub>28</sub> O <sub>5</sub>            | 360.4          | 361.1              | 315.0          | 325.0         | 6.91            |
| COR                  | COR-d4          | C <sub>21</sub> H <sub>30</sub> O <sub>5</sub>            | 362.4          | 363.1              | 121.0          | 327.2         | 7.62            |
| 11-deoxyCOR          | 11-deoxyCOR-d5  | C <sub>21</sub> H <sub>30</sub> O <sub>4</sub>            | 346.4          | 347.0              | 108.9          | 96.9          | 8.74            |
| COS                  | COS-d8          | C <sub>21</sub> H <sub>30</sub> O <sub>4</sub>            | 346.4          | 347.0              | 121.0          | 163.1         | 8.56            |
| 11-deoxyCOS          | 11-deoxyCOS-d8  | C <sub>21</sub> H <sub>30</sub> O <sub>3</sub>            | 330.4          | 331.1              | 108.9          | 96.9          | 9.66            |
| CORNE                | COR-d4          | C <sub>21</sub> H <sub>28</sub> O <sub>5</sub>            | 360.4          | 361.1              | 163.1          | 121.0         | 7.26            |
| E1                   | E1-d4           | C <sub>18</sub> H <sub>22</sub> O <sub>2</sub>            | 270.4          | 271.3              | 132.9          | 197.1         | 9.46            |
| βE2                  | βE2-d5          | C <sub>18</sub> H <sub>24</sub> O <sub>2</sub>            | 272.4          | 255.2 <sup>f</sup> | 159.0          | 132.9         | 9.58            |
| PREG                 | PREG-d4         | C <sub>21</sub> H <sub>32</sub> O <sub>2</sub>            | 316.5          | 299.1 <sup>†</sup> | 281.1          | 159.0         | 13.10           |
| 17-OHPREG            | DHEA-d6         | C <sub>21</sub> H <sub>32</sub> O <sub>3</sub>            | 332.4          | 297.1 <sup>e</sup> | 279.1          | 159.0         | 10.49           |
| PROG                 | PROG-d9         | C <sub>21</sub> H <sub>30</sub> O <sub>2</sub>            | 314.5          | 315.2              | 108.9          | 279.1         | 12.20           |
| 17-OHPROG            | DHEA-d6         | C <sub>21</sub> H <sub>30</sub> O <sub>3</sub>            | 330.4          | 331.1              | 108.9          | 313.0         | 10.17           |

<sup>a</sup>See Figure 1 of the main paper for abbreviations; <sup>b</sup>internal standard; <sup>c</sup>molecular formula; <sup>d</sup>molar mass; <sup>e</sup>M+1 -18; <sup>f</sup>M+1 -2 x 18.

**Appendix 1.** Purity data for compound **1** provided by MayBridge LTD vendor.

| <b>131917</b>           |                       |
|-------------------------|-----------------------|
| <i>Analysis Number</i>  | <b>131917</b>         |
| <i>Compound Code</i>    | <b>ML00080</b>        |
| <i>Batch/Book No</i>    |                       |
| <i>Project Code</i>     | <b>QC-SCR</b>         |
| <i>Program File</i>     | <b>Test_1G</b>        |
| <i>Quantif'n Method</i> | <b>High_5 params</b>  |
| <i>Data Collected</i>   | <b>08/02/16 14:21</b> |
| <i>Injection Volume</i> | <b>10.0</b>           |
| <i>Mol. Weight</i>      | <b>347</b>            |
| <i>Submitter</i>        | <b>QC</b>             |
| <i>Sample Tray</i>      | <b>CStk1_01</b>       |
| <i>Sample Position</i>  | <b>40</b>             |
| <i>Analyst</i>          | <b>SMB</b>            |
| <i>PDA Wavelength</i>   | <b>215</b>            |

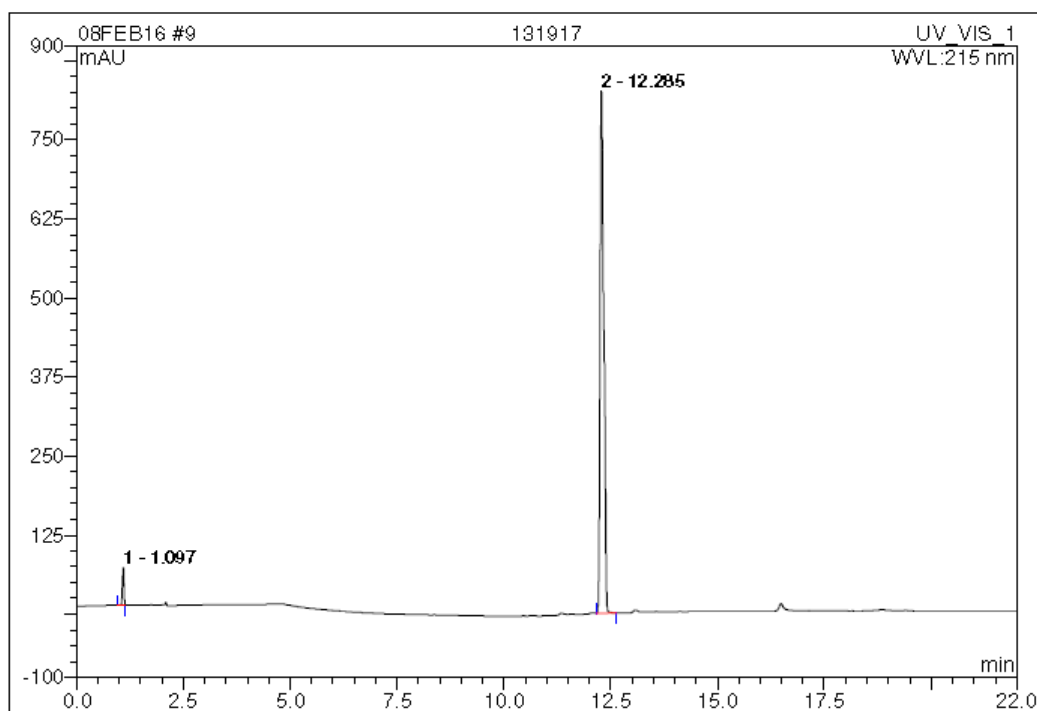

| No.           | Ret. Time<br>min | Height<br>mAU | Area<br>mAU*sec | Rel. Area<br>% |
|---------------|------------------|---------------|-----------------|----------------|
| 1             | 1.10             | 59.607        | 157.324         | 3.08           |
| 2             | 12.29            | 825.831       | 4957.983        | 96.92          |
| <b>Total:</b> |                  | 885.438       | 5115.307        | 100.00         |

HPLC data

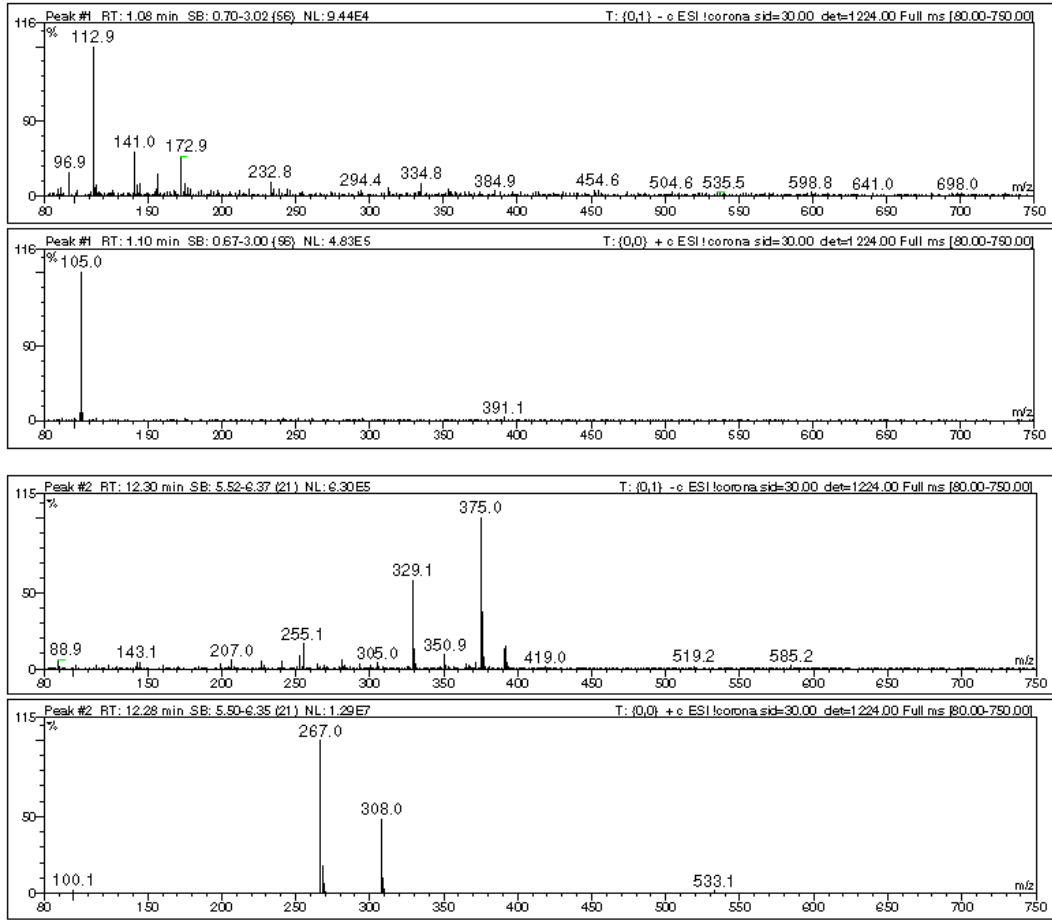

MS data

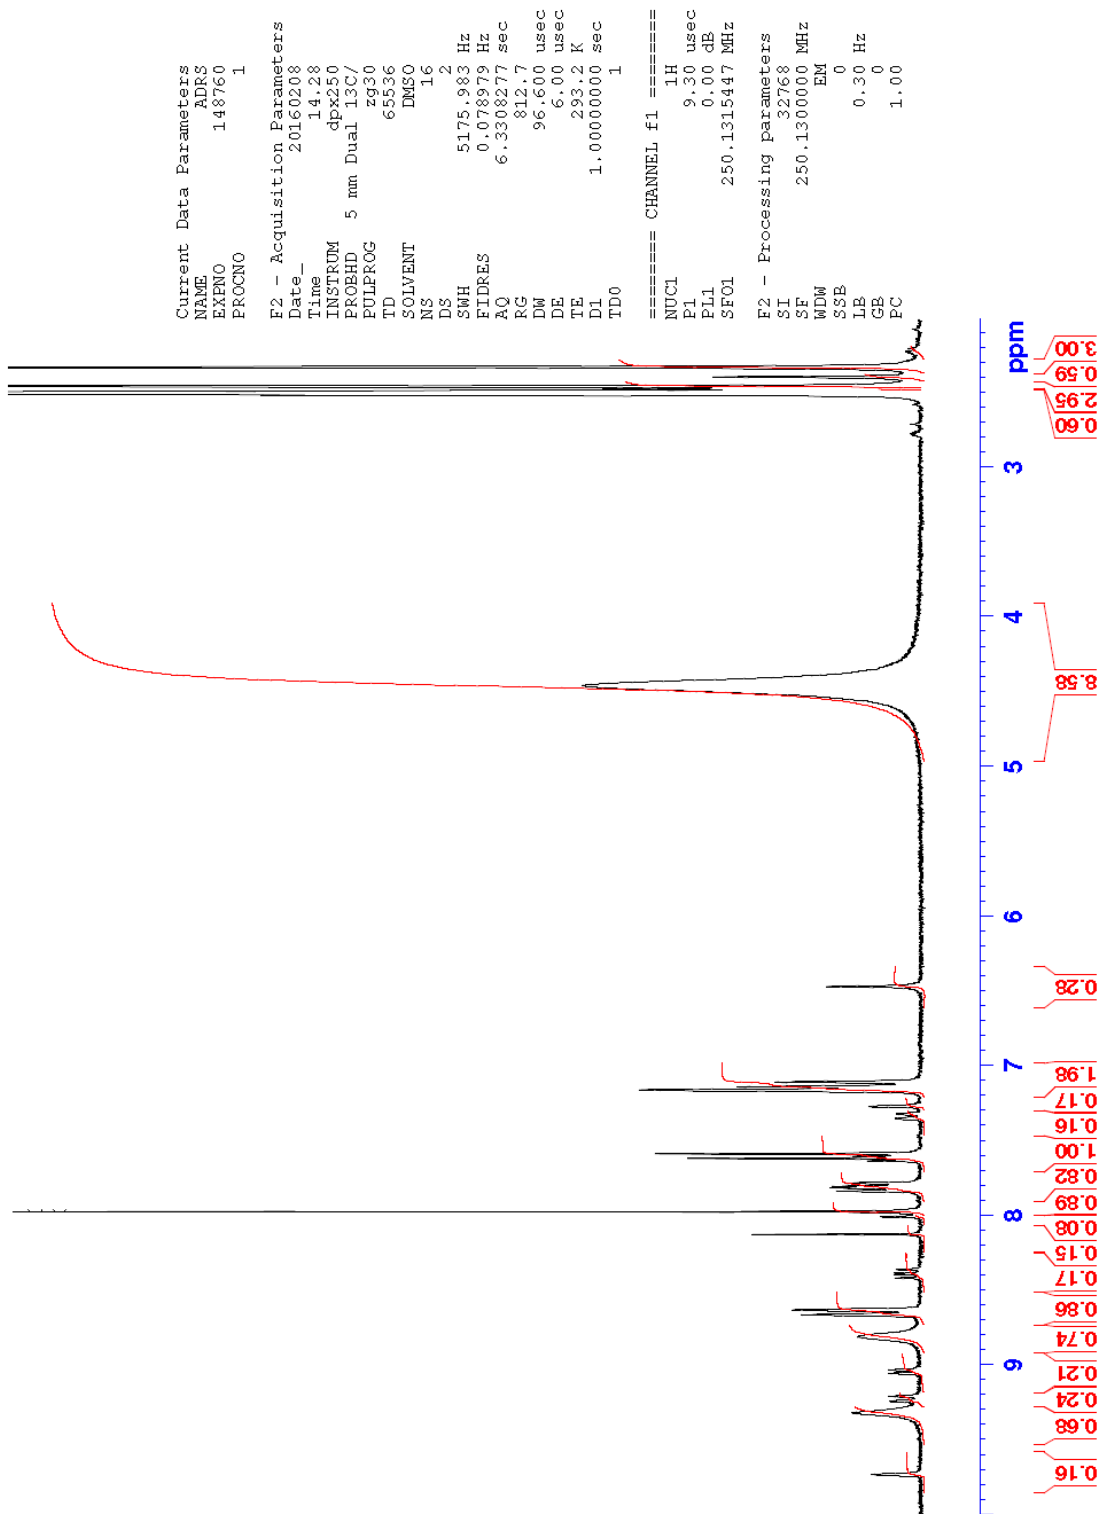

<sup>1</sup>H NMR spectrum

According to the NMR data, the sample is a mixture of hydrobromide salt (87 %) and free base (13%) of **1**.

## Appendix 2. Purity data for compound 2 provided by the ChemBridge vendor.

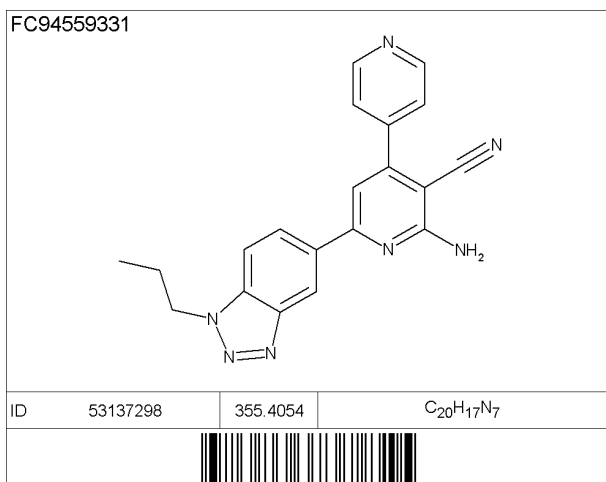

Data File R:\HPLC\AUTO\FC945593\1GD-1501.D  
 Sample Name: FC945593P1-G-04  
 Instrument 1 11/10/2011 17:26:30  
 PMP1, Solvent A : 0.1%TFA in Acn/H2O (2.5:97.5)  
 PMP1, Solvent B : 0.1% TFA in AcN  
 PMP1, Solvent C : 0.1%FA in ACN/H2O (2.5:97.5)  
 PMP1, Solvent D : 0.1%FA in ACN  
 Ionization mode : APCI Positive

Signal 1: ADC1 A, ELSD

| Peak #   | RetTime [min] | Type | Width [min] | Area [mV*s] | Height [mV] | %        |
|----------|---------------|------|-------------|-------------|-------------|----------|
| 1        | 1.247         | MM   | 0.0411      | 197.33905   | 79.97787    | 100.0000 |
| Totals : |               |      |             | 197.33905   | 79.97787    |          |

Signal 2: DAD1 A, Sig=300,200 Ref=off

| Peak #   | RetTime [min] | Type | Width [min] | Area [mAU*s] | Height [mAU] | %        |
|----------|---------------|------|-------------|--------------|--------------|----------|
| 1        | 1.192         | MM   | 0.0412      | 3146.31299   | 1273.87756   | 100.0000 |
| Totals : |               |      |             | 3146.31299   | 1273.87756   |          |

Signal 3: MSD1 TIC, MS File

| Peak #   | RetTime [min] | Type | Width [min] | Area      | Height    | %        |
|----------|---------------|------|-------------|-----------|-----------|----------|
| 1        | 1.318         | MM   | 0.0825      | 8.56650e6 | 1.73153e6 | 100.0000 |
| Totals : |               |      |             | 8.56650e6 | 1.73153e6 |          |

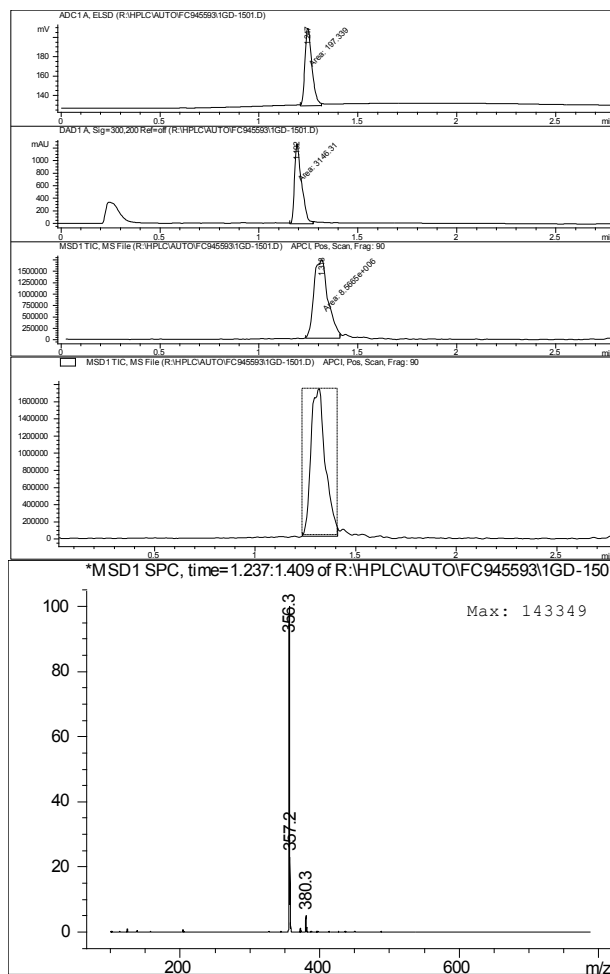

## References

1. Pinto-Bazurco Mendieta MAE, Negri M, Jagusch C, Müller-Vieira U, Lauterbach T, Hartmann RW. Synthesis, Biological Evaluation, and Molecular Modeling of Abiraterone Analogues: Novel CYP17 Inhibitors for the Treatment of Prostate Cancer. *J. Med. Chem.* **51**, 5009-5018 (2008).
2. Hu Q, Jagusch C, Hille UE, Hauptenthal Jr, Hartmann RW. Replacement of Imidazolyl by Pyridyl in Biphenylmethylenes Results in Selective CYP17 and Dual CYP17/CYP11B1 Inhibitors for the Treatment of Prostate Cancer. *J. Med. Chem.* **53**, 5749-5758 (2010).
3. Hu Q, Yin L, Jagusch C, Hille UE, Hartmann RW. Isopropylidene Substitution Increases Activity and Selectivity of Biphenylmethylene 4-Pyridine Type CYP17 Inhibitors. *J. Med. Chem.* **53**, 5049-5053 (2010).
